# Supplementary material
Source: PubMed Central journal article supplement (PMC8379331)
Supplement: 12250_2021_344_MOESM1_ESM.pdf [file 12250_2021_344_MOESM1_ESM.pdf]

## Electronic Supplementary Material

### HRV16 Infection Induces Changes in the Expression of Multiple piRNAs

Jie Li<sup>1,2</sup> • Xinling Wang<sup>1,2</sup> • Yanhai Wang<sup>1,2</sup> • Juan Song<sup>1,2</sup> • Qinqin Song<sup>1,2</sup> • Yanbin Wang<sup>3✉</sup> • Jun Han<sup>1,2✉</sup>

1. State Key Laboratory of Infectious Disease Prevention and Control, Collaborative Innovation Center for Diagnosis and Treatment of Infectious Diseases, National Institute for Viral Disease Control and Prevention, Chinese Center for Disease Control and Prevention, Beijing 102206, China;
2. Center for Biosafety Mega-Science, Chinese Academy of Sciences, Beijing 102206, China
3. China National Accreditation Service for Conformity Assessment, Beijing 100062, China

Supporting information to DOI: 10.1007/s12250-021-00344-4

Table S1. Overall Difference in piRNAs Expression between Control and HRV16-Infected H1-HeLa Cells.

Table S2. Normalized piRNAs between Control and HRV16-Infected H1-HeLa Cells.

Table S3. Differential Expression piRNAs at Different Time Points Post Infection.
